# Supplementary material
Source: publisher figshare collection journal article supplement (https://acs.figshare.com/ndownloader/files/3752167)
Supplement: Supplementary file 1 [file 3752167]

100
2 triplet
Cr  0.058203  0.276624 -0.139794
O   0.961366 -1.242168 -0.321097
O  -1.717646  0.136786 -0.015139
C   1.917323 -2.263586 -0.532467
C   2.807663 -2.363762  0.741382
C   1.002300 -3.602338 -0.696014
C   2.832415 -1.786921 -1.779303
C   3.774781 -3.367920  0.922805
C   2.665771 -1.431531  1.779085
C   1.686348 -4.816541 -1.362156
C   0.521534 -4.044474  0.708097
C  -0.282249 -3.321054 -1.515625
C   3.453354 -0.409918 -1.436016
C   4.032570 -2.701606 -2.127174
C   1.996721 -1.606176 -3.064628
C   4.556582 -3.432840  2.077422
H   3.930654 -4.122235  0.163583
C   3.445699 -1.488341  2.935572
H   1.931676 -0.642572  1.681072
H   2.611346 -5.124868 -0.870131
H   1.000953 -5.671283 -1.306502
H   1.897089 -4.646611 -2.421979
H  -0.250053 -4.816407  0.601998
H   1.328427 -4.461972  1.316020
H   0.081853 -3.206935  1.257919
H  -0.079977 -2.990916 -2.535449
H  -0.859659 -4.250877 -1.586165
H  -0.917644 -2.576205 -1.034884
H   4.091228 -0.086629 -2.267196
H   2.696236  0.359374 -1.278125
H   4.078068 -0.459518 -0.539283
H   3.755376 -3.732279 -2.352278
H   4.518349 -2.297060 -3.023529
H   4.785345 -2.709140 -1.335192
H   1.087532 -1.027240 -2.878958
H   2.591733 -1.063122 -3.808925
H   1.712226 -2.560580 -3.517682
C   4.399659 -2.491396  3.093942
H   5.290324 -4.228749  2.177880
H   3.300512 -0.743284  3.714136
H   5.008272 -2.541249  3.992825
C  -2.993711  0.332219  0.569597
C  -3.999106 -0.448937 -0.331944
C  -2.898575 -0.341038  2.045076
C  -3.324056  1.913669  0.462686
C  -5.346793 -0.653148  0.012340
C  -3.569736 -0.984513 -1.555325
C  -3.972719  0.102506  3.064639
C  -2.987051 -1.881284  1.909610
C  -1.525515 -0.062499  2.709819
C  -3.068425  2.361067 -0.997636
C  -4.789142  2.300486  0.774687
C  -2.414152  2.776643  1.364188
C  -6.216414 -1.359321 -0.820130
H  -5.742144 -0.264046  0.941344
C  -4.436136 -1.688571 -2.394199
H  -2.538224 -0.847618 -1.851235
H  -4.994521 -0.070546  2.721271
H  -3.846620 -0.486469  3.981545
H  -3.879764  1.155206  3.345307
H  -2.700830 -2.347346  2.860469
H  -3.993976 -2.224851  1.660744
H  -2.305543 -2.249721  1.137122
H  -1.276884  0.997258  2.776902
H  -1.541274 -0.459774  3.731580
H  -0.712909 -0.584027  2.192541
H  -3.328549  3.421175 -1.102581
H  -2.019337  2.242348 -1.275418
H  -3.677735  1.795960 -1.708956
H  -5.116385  2.017584  1.777209
H  -4.876329  3.391590  0.706282
H  -5.488604  1.875960  0.050905
H  -1.355807  2.569714  1.190786
H  -2.580386  3.834877  1.128467
H  -2.629885  2.650694  2.429289
C  -5.767406 -1.882862 -2.032261
H  -7.250267 -1.498119 -0.513638
H  -4.061143 -2.086793 -3.333858
H  -6.444164 -2.432534 -2.681111
N   0.797001  1.757174 -0.183532
C   1.446955  2.961278 -0.274602
C   1.505029  3.638474 -1.521325
C   2.066648  3.517841  0.876017
C   2.173975  4.860175 -1.583124
C   0.863393  3.041558 -2.747748
C   2.718205  4.743104  0.752396
C   2.028942  2.787781  2.194360
C   2.783108  5.436462 -0.462702
H   2.221746  5.378748 -2.538729
H   1.034427  3.674427 -3.623731
H   1.264539  2.044173 -2.966096
H  -0.220049  2.927554 -2.619878
H   3.194650  5.169627  1.633179
H   0.999491  2.589633  2.516610
H   2.534754  1.816424  2.127471
H   2.522226  3.372053  2.977041
C   3.470433  6.777777 -0.553506
H   2.798821  7.591598 -0.247480
H   4.349640  6.823713  0.098703
H   3.796203  6.992950 -1.576537

#=============================END

100
2 singlet
Cr -0.520280 -0.022588  0.061943
O   0.311946  1.518453  0.049566
O   0.414969 -1.505024  0.098881
C   0.767464  2.858135  0.201926
C   2.215387  2.900014 -0.377036
C  -0.219488  3.758657 -0.721069
C   0.810219  3.101992  1.800965
C   3.000944  4.066540 -0.403596
C   2.787696  1.741581 -0.923653
C  -0.065912  5.287651 -0.570872
C   0.064818  3.403848 -2.202483
C  -1.717671  3.452130 -0.477893
C   1.611558  1.942144  2.444560
C   1.507072  4.402774  2.268311
C  -0.598856  3.085388  2.431516
C   4.288747  4.070016 -0.943102
H   2.623762  4.994544  0.001128
C   4.077236  1.737926 -1.458539
H   2.215919  0.824886 -0.934967
H   0.936660  5.650607 -0.805140
H  -0.749190  5.771787 -1.279524
H  -0.344521  5.638898  0.426483
H  -0.666637  3.908787 -2.844116
H   1.061610  3.717785 -2.522620
H  -0.022066  2.326809 -2.376659
H  -2.089230  3.859116  0.463619
H  -2.301832  3.921996 -1.278208
H  -1.929420  2.383932 -0.494973
H   1.736225  2.140422  3.515456
H   1.097600  0.982669  2.344343
H   2.608834  1.843064  2.005413
H   1.102719  5.307953  1.810671
H   1.359651  4.497391  3.351037
H   2.585056  4.378075  2.093814
H  -1.206634  2.259299  2.053840
H  -0.502427  2.960953  3.517011
H  -1.141789  4.020374  2.264828
C   4.839333  2.904278 -1.473370
H   4.860484  4.994728 -0.943040
H   4.480527  0.812869 -1.862374
H   5.842991  2.906425 -1.890143
C   0.914514 -2.825173 -0.087271
C   2.435356 -2.772382  0.253602
C   0.137786 -3.735149  1.011612
C   0.716957 -3.134449 -1.662775
C   3.277319 -3.897453  0.191210
C   3.021960 -1.566807  0.666706
C   0.347932 -5.259688  0.885841
C   0.635505 -3.310100  2.416557
C  -1.394187 -3.511178  1.004508
C   1.332725 -1.960914 -2.465904
C   1.409229 -4.412976 -2.194095
C  -0.773183 -3.228328 -2.054116
C   4.631794 -3.817163  0.519828
H   2.891998 -4.858192 -0.118671
C   4.377461 -1.479604  0.989867
H   2.409553 -0.679770  0.741024
H   1.393811 -5.563328  0.964708
H  -0.184702 -5.748289  1.711078
H  -0.068290 -5.664105 -0.041234
H   0.054309 -3.836813  3.182420
H   1.689959 -3.549369  2.574785
H   0.504757 -2.235336  2.576856
H  -1.890564 -3.984136  0.155865
H  -1.815134 -3.963029  1.910756
H  -1.658371 -2.453943  1.005480
H   1.301757 -2.199316 -3.535425
H   0.781327 -1.028232 -2.320385
H   2.377614 -1.785307 -2.192605
H   1.142659 -5.317772 -1.644103
H   1.091597 -4.563890 -3.232881
H   2.497574 -4.320789 -2.203597
H  -1.365556 -2.426963 -1.607011
H  -0.863135 -3.144957 -3.144362
H  -1.216099 -4.187654 -1.770754
C   5.194497 -2.606012  0.919847
H   5.245873 -4.712235  0.458359
H   4.788211 -0.521019  1.296291
H   6.249499 -2.543208  1.173038
N  -2.145170 -0.075832  0.020965
C  -3.522034 -0.093211 -0.029546
C  -4.182095 -0.024277 -1.283404
C  -4.269799 -0.169085  1.173868
C  -5.576819 -0.041503 -1.301516
C  -3.397401  0.073985 -2.567246
C  -5.661738 -0.183542  1.091800
C  -3.575911 -0.224713  2.511383
C  -6.339050 -0.125705 -0.131518
H  -6.084569  0.015158 -2.262570
H  -4.070362  0.143974 -3.427340
H  -2.744739  0.955018 -2.574700
H  -2.751744 -0.799979 -2.713928
H  -6.236216 -0.239751  2.014591
H  -2.924735 -1.103045  2.592847
H  -2.941640  0.655294  2.671976
H  -4.306039 -0.268427  3.325314
C  -7.847319 -0.177341 -0.187549
H  -8.210225 -1.213898 -0.217973
H  -8.298316  0.296578  0.691122
H  -8.233003  0.327034 -1.079957

#=============================END

100
2 quintet
Cr -0.460533  0.061558  0.293963
O   0.373733  1.588654 -0.149820
O   0.247768 -1.570996  0.480444
C   1.083527  2.739401  0.290018
C   2.488606  2.685101 -0.385276
C   0.221943  3.972625 -0.337128
C   1.247274  2.647730  1.895356
C   3.456867  3.696621 -0.247417
C   2.831174  1.593081 -1.197160
C   0.624829  5.392793  0.115381
C   0.378962  3.918219 -1.878148
C  -1.293012  3.842856 -0.035594
C   1.889326  1.283778  2.249748
C   2.172622  3.705337  2.547568
C  -0.110180  2.723916  2.630135
C   4.698580  3.614510 -0.880545
H   3.260703  4.569284  0.359111
C   4.073627  1.502536 -1.828184
H   2.108912  0.802002 -1.344144
H   1.661958  5.645784 -0.114646
H  -0.001779  6.114480 -0.423861
H   0.448530  5.559098  1.181625
H  -0.287613  4.656780 -2.339154
H   1.398988  4.146192 -2.198579
H   0.116831  2.931114 -2.269063
H  -1.550841  4.166769  0.974709
H  -1.847204  4.490095 -0.725888
H  -1.655614  2.823745 -0.165346
H   2.110006  1.254504  3.322961
H   1.235786  0.428976  2.045175
H   2.827655  1.122242  1.711521
H   1.910126  4.734628  2.297588
H   2.088086  3.608243  3.636891
H   3.223061  3.545327  2.294081
H  -0.877087  2.095456  2.168308
H   0.020914  2.378717  3.663233
H  -0.494413  3.746590  2.681833
C   5.019314  2.514423 -1.674559
H   5.416137  4.420348 -0.746679
H   4.294991  0.632922 -2.441782
H   5.986686  2.449739 -2.165668
C   0.558034 -2.887565  0.053385
C   2.111804 -3.002863 -0.000707
C  -0.040913 -3.815237  1.252678
C  -0.026791 -3.082617 -1.439409
C   2.789540 -4.217444 -0.210251
C   2.904683 -1.858295  0.159046
C  -0.200565 -5.319476  0.939107
C   0.892419 -3.679679  2.481406
C  -1.433656 -3.323450  1.723121
C   0.506854 -1.930621 -2.326462
C   0.397803 -4.384685 -2.161974
C  -1.568924 -3.022176 -1.477799
C   4.183007 -4.280492 -0.256068
H   2.239572 -5.138996 -0.341439
C   4.299252 -1.912182  0.105142
H   2.423244 -0.906510  0.329799
H   0.727640 -5.807330  0.634613
H  -0.536615 -5.828365  1.851138
H  -0.958478 -5.509228  0.173384
H   0.416174 -4.141776  3.354594
H   1.858124 -4.169166  2.331521
H   1.077805 -2.627121  2.715877
H  -2.207263 -3.423492  0.960397
H  -1.744532 -3.935368  2.578864
H  -1.409941 -2.282301  2.047324
H   0.165901 -2.074693 -3.358401
H   0.144996 -0.949410 -2.001878
H   1.599918 -1.895820 -2.335871
H   0.128842 -5.293285 -1.620329
H  -0.117482 -4.423738 -3.129567
H   1.470357 -4.409715 -2.367734
H  -1.962116 -2.168660 -0.919887
H  -1.902016 -2.925467 -2.518847
H  -2.029692 -3.930832 -1.079862
C   4.950431 -3.126282 -0.101148
H   4.665989 -5.241394 -0.416137
H   4.869718 -0.994512  0.223131
H   6.035515 -3.174665 -0.140220
N  -2.274715  0.203022  0.621401
C  -3.496227  0.289827  0.130027
C  -3.802631  0.565436 -1.269658
C  -4.619732  0.128842  1.049492
C  -5.124343  0.673516 -1.668442
C  -2.696106  0.732038 -2.272966
C  -5.914648  0.236475  0.578804
C  -4.342645 -0.150967  2.499601
C  -6.198378  0.509015 -0.774246
H  -5.343522  0.889180 -2.712399
H  -3.098821  1.006358 -3.252712
H  -1.981443  1.503764 -1.969788
H  -2.128429 -0.198043 -2.395450
H  -6.743316  0.114344  1.273907
H  -3.778706 -1.082361  2.621005
H  -3.723084  0.638934  2.938517
H  -5.274316 -0.227762  3.068714
C  -7.623220  0.595656 -1.253670
H  -8.045927 -0.407157 -1.408335
H  -8.262214  1.101127 -0.520849
H  -7.697946  1.132414 -2.204461

#=============================END

105
3 triplet
Cr  0.003137 -0.260615  0.054963
O   1.553220 -1.145118  0.095460
O  -1.465200 -1.279448  0.092597
C   2.891709 -1.414789  0.455039
C   3.820841 -0.588669 -0.483154
C   3.048793 -0.938263  2.002166
C   3.082370 -2.988020  0.114978
C   5.211478 -0.496484 -0.297743
C   3.283577  0.093338 -1.584515
C   4.201332 -1.587835  2.802813
C   3.258385  0.595381  2.045929
C   1.753988 -1.207610  2.812653
C   2.618620 -3.226266 -1.344234
C   4.535243 -3.510924  0.191696
C   2.203441 -3.885703  1.011958
C   6.018802  0.247228 -1.159387
H   5.688557 -1.007508  0.528303
C   4.086116  0.836601 -2.453088
H   2.218791  0.037007 -1.768747
H   5.183456 -1.447527  2.346531
H   4.245677 -1.115827  3.792211
H   4.049814 -2.658079  2.966283
H   3.130209  0.951246  3.075775
H   4.254318  0.894943  1.710944
H   2.522995  1.108151  1.418834
H   1.421433 -2.244502  2.776998
H   1.937353 -0.953417  3.863390
H   0.924807 -0.574614  2.480021
H   2.761663 -4.283179 -1.599671
H   1.561838 -2.985075 -1.475970
H   3.196012 -2.632013 -2.058702
H   4.995264 -3.394370  1.174713
H   4.524650 -4.584760 -0.031288
H   5.181806 -3.035467 -0.550049
H   1.160910 -3.557281  1.010162
H   2.227380 -4.911717  0.624817
H   2.555215 -3.928783  2.047006
C   5.461195  0.922124 -2.245085
H   7.089417  0.295611 -0.976408
H   3.627798  1.347209 -3.296618
H   6.088797  1.500894 -2.917582
C  -2.735008 -1.699865 -0.362436
C  -3.808638 -0.756502  0.256860
C  -2.705345 -1.574371 -1.984974
C  -2.914274 -3.173554  0.289616
C  -5.164288 -0.787418 -0.113799
C  -3.447142  0.159615  1.255410
C  -3.728448 -2.441316 -2.755598
C  -2.946742 -0.098968 -2.389187
C  -1.315596 -1.946512 -2.562221
C  -2.642868 -3.066190  1.811459
C  -4.323681 -3.794610  0.150899
C  -1.890165 -4.181445 -0.273557
C  -6.106007  0.057809  0.474960
H  -5.507869 -1.477129 -0.873337
C  -4.385532  1.003905  1.853532
H  -2.413847  0.209363  1.571268
H  -4.764652 -2.259022 -2.464058
H  -3.656182 -2.197934 -3.822869
H  -3.528670 -3.511621 -2.658154
H  -2.718448  0.029251 -3.454571
H  -3.979958  0.218714 -2.229518
H  -2.298010  0.577511 -1.824384
H  -0.989571 -2.954409 -2.306838
H  -1.360604 -1.880802 -3.655747
H  -0.531802 -1.252494 -2.241246
H  -2.774332 -4.053406  2.270322
H  -1.624360 -2.729459  2.016678
H  -3.336337 -2.377693  2.303150
H  -4.647893 -3.927208 -0.882892
H  -4.305815 -4.790412  0.610505
H  -5.083141 -3.211693  0.678057
H  -0.873067 -3.783689 -0.231572
H  -1.914366 -5.095174  0.332805
H  -2.108780 -4.478551 -1.303624
C  -5.723380  0.961532  1.465718
H  -7.143602  0.003540  0.154871
H  -4.063476  1.694185  2.629759
H  -6.455860  1.617992  1.927946
N  -0.089624  1.371000  0.017776
C  -0.147689  2.803313  0.011865
C   0.885994  3.369320 -0.999781
C  -1.563382  3.297924 -0.387579
C   0.190828  3.341290  1.430213
H   0.653781  2.984808 -2.001566
H   1.887812  3.007456 -0.738681
C   0.838598  4.912214 -0.990513
H  -2.304053  2.881897  0.305510
H  -1.808124  2.916357 -1.386696
C  -1.604708  4.840862 -0.377269
H   1.184661  2.984860  1.725200
H  -0.530062  2.933739  2.150750
C   0.146434  4.883444  1.432585
H   1.574226  5.294637 -1.710209
C  -0.574124  5.389440 -1.385669
C   1.177604  5.428984  0.423048
H  -2.612374  5.171911 -0.660499
C  -1.265952  5.358054  1.036336
H   0.389575  5.243766  2.440855
H  -0.819224  5.047278 -2.400461
H  -0.609121  6.487352 -1.401463
H   2.190325  5.113798  0.709059
H   1.169357  6.527412  0.434113
H  -1.314928  6.455299  1.058242
H  -2.005732  4.990528  1.760704

#=============================END

105
3 singlet
Cr -0.370898 -0.011795  0.056161
O   0.499908  1.516360 -0.031954
O   0.576333 -1.493494  0.170336
C   1.007740  2.824524  0.194888
C   2.464801  2.840027 -0.362459
C   0.085056  3.814026 -0.703562
C   1.028871  2.993370  1.804742
C   3.303530  3.967285 -0.295857
C   2.984326  1.703999 -1.000378
C   0.296243  5.325321 -0.469235
C   0.387058  3.524848 -2.195805
C  -1.426417  3.551314 -0.512327
C   1.780659  1.779552  2.406659
C   1.757134  4.245298  2.352492
C  -0.392163  2.994592  2.409583
C   4.594235  3.952421 -0.828229
H   2.964940  4.879613  0.173290
C   4.275890  1.681912 -1.530384
H   2.366525  0.821929 -1.089650
H   1.321939  5.654156 -0.648254
H  -0.338213  5.874985 -1.175655
H  -0.003916  5.638729  0.534639
H  -0.301841  4.102320 -2.823385
H   1.405992  3.802154 -2.477034
H   0.246844  2.465069 -2.430634
H  -1.804303  3.912678  0.445602
H  -1.976912  4.086878 -1.295431
H  -1.663646  2.491722 -0.598812
H   1.892596  1.923652  3.487651
H   1.239902  0.841858  2.254972
H   2.781811  1.668008  1.979620
H   1.401512  5.185202  1.925763
H   1.578003  4.296099  3.433329
H   2.838924  4.187887  2.212530
H  -1.022277  2.208770  1.985427
H  -0.320080  2.816645  3.489532
H  -0.898914  3.955618  2.278643
C   5.093184  2.807467 -1.447421
H   5.208433  4.846428 -0.753633
H   4.637059  0.774828 -2.007894
H   6.098764  2.794917 -1.859434
C   1.052419 -2.820365 -0.016926
C   2.601297 -2.767509  0.161583
C   0.401595 -3.687004  1.194433
C   0.695453 -3.199153 -1.548665
C   3.428679 -3.901541  0.067064
C   3.229725 -1.551404  0.464729
C   0.529667 -5.219891  1.060975
C   1.095568 -3.267444  2.515179
C  -1.103016 -3.393106  1.393158
C   1.218686 -2.061487 -2.461718
C   1.337931 -4.499082 -2.092920
C  -0.825148 -3.312861 -1.785600
C   4.808920 -3.818375  0.259044
H   3.011718 -4.872232 -0.160369
C   4.610660 -1.461158  0.651281
H   2.628606 -0.659363  0.561883
H   1.562137 -5.564552  0.975826
H   0.118922 -5.681018  1.967780
H  -0.043701 -5.614983  0.217208
H   0.575317 -3.730405  3.362049
H   2.141975 -3.579669  2.555582
H   1.060183 -2.182112  2.652634
H  -1.725608 -3.770039  0.580998
H  -1.436398 -3.891731  2.311349
H  -1.298563 -2.326667  1.503776
H   1.087699 -2.349969 -3.511265
H   0.672131 -1.126737 -2.308199
H   2.282699 -1.865746 -2.297486
H   1.136897 -5.379035 -1.478888
H   0.915141 -4.696808 -3.085323
H   2.418595 -4.404508 -2.220236
H  -1.369470 -2.467638 -1.358383
H  -1.018480 -3.322441 -2.865471
H  -1.239262 -4.240103 -1.378492
C   5.412616 -2.595857  0.550501
H   5.410536 -4.720368  0.177700
H   5.052269 -0.493560  0.874954
H   6.487510 -2.531111  0.697554
N  -1.984197 -0.049915  0.022933
C  -3.422933 -0.041297 -0.038013
C  -3.880828  0.335362 -1.473719
C  -3.992508 -1.441088  0.315113
C  -3.998640  0.994018  0.965302
H  -3.467737 -0.391365 -2.184833
H  -3.473119  1.318320 -1.738388
C  -5.422735  0.350590 -1.546672
H  -3.664296 -1.720806  1.323234
H  -3.582311 -2.185009 -0.378002
C  -5.533504 -1.424186  0.236038
H  -3.594709  1.986640  0.736928
H  -3.667338  0.733401  1.978906
C  -5.540175  1.007920  0.884656
H  -5.727157  0.621598 -2.566177
C  -5.970371 -1.047790 -1.193926
C  -5.975845  1.386676 -0.546199
H  -5.913136 -2.423192  0.487827
C  -6.089288 -0.389640  1.235576
H  -5.927292  1.748312  1.596977
H  -5.598029 -1.791844 -1.911449
H  -7.066396 -1.052745 -1.268101
H  -5.609231  2.390633 -0.799869
H  -7.072060  1.421063 -0.608623
H  -7.187301 -0.383547  1.201308
H  -5.803112 -0.662932  2.260553

#=============================END

105
3 quintet
Cr -0.305927  0.015645  0.392971
O   0.356388  1.594829 -0.133755
O   0.509547 -1.564495  0.513500
C   1.001335  2.814098  0.219400
C   2.420400  2.783992 -0.427491
C   0.093814  3.944448 -0.525351
C   1.132924  2.864336  1.829313
C   3.328606  3.856422 -0.353187
C   2.832515  1.661072 -1.159389
C   0.363427  5.407648 -0.113948
C   0.337587  3.831332 -2.051138
C  -1.420393  3.705670 -0.316037
C   1.826537  1.564872  2.306653
C   1.999658  4.012124  2.406467
C  -0.239935  2.936285  2.533652
C   4.581219  3.800451 -0.966564
H   3.074748  4.758609  0.184428
C   4.086623  1.596481 -1.770390
H   2.157009  0.823824 -1.262665
H   1.397506  5.720938 -0.273334
H  -0.261173  6.060537 -0.736295
H   0.091417  5.607029  0.926348
H  -0.373001  4.476579 -2.581432
H   1.345634  4.142188 -2.336814
H   0.186223  2.804940 -2.397943
H  -1.749771  3.895875  0.706378
H  -1.976933  4.391639 -0.966060
H  -1.702737  2.687563 -0.583607
H   2.042814  1.638800  3.378484
H   1.202913  0.671383  2.183668
H   2.772214  1.390746  1.785550
H   1.700030  5.004492  2.065909
H   1.894956  4.002862  3.498220
H   3.061215  3.877288  2.186787
H  -0.956640  2.214148  2.133570
H  -0.107393  2.709760  3.598916
H  -0.683852  3.934516  2.474382
C   4.973085  2.667149 -1.678116
H   5.250568  4.653222 -0.883765
H   4.363972  0.700099 -2.318927
H   5.949141  2.622663 -2.153998
C   0.985577 -2.823309  0.058032
C   2.543489 -2.767439  0.081606
C   0.449587 -3.854155  1.202328
C   0.487055 -3.021839 -1.465072
C   3.359770 -3.883775 -0.179126
C   3.198336 -1.566434  0.383876
C   0.505747 -5.355012  0.840045
C   1.297504 -3.641098  2.480984
C  -1.015816 -3.564227  1.612070
C   0.900579 -1.772185 -2.281192
C   1.096333 -4.227597 -2.221124
C  -1.046278 -3.148250 -1.566376
C   4.752174 -3.798033 -0.140433
H   2.922862 -4.843383 -0.416655
C   4.591270 -1.471332  0.416749
H   2.609273 -0.687733  0.599828
H   1.508294 -5.707790  0.589845
H   0.180114 -5.932141  1.714273
H  -0.169985 -5.614983  0.019993
H   0.852875 -4.203908  3.310433
H   2.328687 -3.982923  2.362388
H   1.320242 -2.584562  2.764590
H  -1.733136 -3.782170  0.819572
H  -1.272695 -4.210618  2.459883
H  -1.157027 -2.530131  1.930218
H   0.648509 -1.925397 -3.336838
H   0.377010 -0.866321 -1.957275
H   1.976077 -1.582556 -2.217721
H   0.947328 -5.182562 -1.713738
H   0.605349 -4.303455 -3.199176
H   2.164833 -4.098420 -2.407546
H  -1.554082 -2.377294 -0.983011
H  -1.351739 -3.029874 -2.613347
H  -1.407971 -4.125853 -1.234971
C   5.380587 -2.588793  0.155771
H   5.344065 -4.686699 -0.345405
H   5.052052 -0.513589  0.643694
H   6.464936 -2.521206  0.182799
N  -2.112408  0.085153  0.875440
C  -3.402308  0.065516  0.279693
C  -3.432443  0.189812 -1.269016
C  -4.076129 -1.296686  0.679246
C  -4.271578  1.208475  0.894636
H  -2.835439 -0.617810 -1.711335
H  -2.963541  1.137321 -1.563735
C  -4.881408  0.130057 -1.797087
H  -4.063066 -1.390756  1.771071
H  -3.485894 -2.124227  0.271523
C  -5.520404 -1.350408  0.137587
H  -3.813053  2.173310  0.648340
H  -4.257277  1.110724  1.986664
C  -5.714505  1.146265  0.353583
H  -4.871416  0.224894 -2.890974
C  -5.511161 -1.220245 -1.398994
C  -5.700913  1.283314 -1.182701
H  -5.958012 -2.316112  0.424867
C  -6.349651 -0.202414  0.745497
H  -6.293520  1.969210  0.793614
H  -4.943985 -2.048340 -1.846070
H  -6.536845 -1.289379 -1.786244
H  -5.266570  2.250281 -1.471400
H  -6.728284  1.265048 -1.571529
H  -7.385334 -0.254201  0.382499
H  -6.387807 -0.299844  1.838999

#=============================END

19
2,6-dimethylphenylisocyanide
C  -3.006905 -0.001831  0.000062
N  -1.825292 -0.001145 -0.000012
C  -0.437463 -0.000270  0.000028
C   0.238444 -1.236355  0.000021
C   0.236909  1.236661  0.000050
C   1.635396 -1.207885 -0.000001
C   1.633892  1.209894  0.000030
C   2.329456  0.001436 -0.000009
H   2.181138 -2.147688  0.000015
H   2.178468  2.150377  0.000082
H   3.415922  0.002110 -0.000010
C  -0.531557  2.533211 -0.000045
H  -1.180851  2.613590 -0.880056
H  -1.183035  2.612505  0.878411
H   0.149974  3.388446  0.001259
C  -0.528404 -2.533864 -0.000032
H  -1.179259 -2.614243  0.878792
H  -1.178102 -2.614809 -0.879682
H   0.154182 -3.388259  0.000654

#=============================END

119
2–CNR’’ triplet
Cr -0.341188  0.042355  0.264628
O   0.842760 -1.217959  0.843133
O  -0.916546  0.042384 -1.461394
N  -1.420977  0.608737  1.408220
C   1.369409 -2.358270  1.491489
C   2.574652 -2.832309  0.612943
C   1.891374 -1.835024  2.943224
C   0.245902 -3.522543  1.460581
C   3.491013 -3.821155  1.012908
C   2.766123 -2.278416 -0.661544
C   2.188699 -2.917440  4.006898
C   3.185307 -1.011240  2.731700
C   0.883559 -0.863716  3.604340
C  -0.245610 -3.685240  0.002607
C   0.724485 -4.928377  1.897175
C  -0.982851 -3.161925  2.321395
C   4.545375 -4.222606  0.190301
H   3.395499 -4.301188  1.977090
C   3.811319 -2.683191 -1.494783
H   2.072344 -1.523877 -1.005759
H   2.916976 -3.666713  3.691357
H   2.611835 -2.423985  4.891172
H   1.283357 -3.434470  4.336612
H   3.450482 -0.498308  3.664246
H   4.037241 -1.629075  2.436386
H   3.031320 -0.250600  1.960070
H  -0.076432 -1.324469  3.836953
H   1.311092 -0.507738  4.550012
H   0.691831  0.004436  2.976232
H  -1.009518 -4.470679 -0.038417
H  -0.691810 -2.769539 -0.387180
H   0.566978 -3.977141 -0.669079
H   1.137033 -4.960131  2.907007
H  -0.140380 -5.603403  1.884038
H   1.464298 -5.343878  1.208609
H  -1.325075 -2.143428  2.125181
H  -1.805276 -3.846861  2.080369
H  -0.787469 -3.262306  3.393471
C   4.714826 -3.656750 -1.072646
H   5.232935 -4.987376  0.543516
H   3.910066 -2.236012 -2.481391
H   5.531215 -3.974049 -1.716283
C  -1.659170  0.112205 -2.658344
C  -2.858032 -0.884710 -2.576614
C  -2.255786  1.615024 -2.770730
C  -0.596389 -0.376492 -3.799597
C  -3.680853 -1.197772 -3.674122
C  -3.163390 -1.517727 -1.364925
C  -3.245862  1.861789 -3.935089
C  -3.049779  1.928986 -1.479951
C  -1.136863  2.671203 -2.882045
C  -0.458152 -1.916728 -3.720912
C  -0.931638 -0.007191 -5.262569
C   0.823778  0.184677 -3.537187
C  -4.739980 -2.100233 -3.565719
H  -3.506987 -0.742097 -4.639137
C  -4.224136 -2.418775 -1.246520
H  -2.566229 -1.293646 -0.492416
H  -4.170112  1.292250 -3.812702
H  -3.521272  2.923912 -3.929152
H  -2.835613  1.645173 -4.922743
H  -3.492008  2.929480 -1.563291
H  -3.868077  1.219239 -1.325654
H  -2.417514  1.911121 -0.591619
H  -0.662148  2.679790 -3.867925
H  -1.564859  3.669272 -2.722927
H  -0.365133  2.509956 -2.125736
H   0.386889 -2.239403 -4.341557
H  -0.263304 -2.242955 -2.695699
H  -1.349389 -2.438066 -4.078831
H  -0.881665  1.070217 -5.445238
H  -0.184738 -0.475458 -5.916139
H  -1.905766 -0.367601 -5.597713
H   1.206659 -0.136512 -2.568364
H   1.499376 -0.202719 -4.309959
H   0.874475  1.273381 -3.580389
C  -5.020614 -2.720483 -2.348718
H  -5.345593 -2.316331 -4.442585
H  -4.422109 -2.884262 -0.284094
H  -5.844780 -3.423757 -2.262723
C   1.236667  1.401263 -0.138193
N   2.106333  2.159151 -0.334949
C   3.152386  3.037658 -0.594654
C   2.864610  4.412555 -0.720243
C   4.452786  2.507478 -0.727106
C   3.937048  5.267980 -0.983180
C   1.460976  4.941220 -0.576210
C   5.485543  3.410986 -0.989883
C   4.715269  1.031265 -0.594253
C   5.234648  4.776142 -1.115796
H   3.745696  6.332519 -1.085225
H   0.773306  4.463101 -1.282778
H   1.064720  4.759375  0.429612
H   1.437145  6.019216 -0.756691
H   6.497845  3.031877 -1.097604
H   4.453590  0.661075  0.403253
H   4.124016  0.446680 -1.307219
H   5.771424  0.809875 -0.769117
H   6.053534  5.459913 -1.320805
C  -2.113337  1.262114  2.396633
C  -1.573395  2.410556  3.043076
C  -3.401270  0.787337  2.781309
C  -2.311061  3.033363  4.049298
C  -4.090713  1.450317  3.794566
C  -3.568441  2.571169  4.450008
H  -1.889432  3.911125  4.536056
H  -5.073695  1.080474  4.080828
C  -4.021907 -0.403898  2.099017
H  -4.148848 -0.231141  1.025081
H  -3.397450 -1.298311  2.202293
H  -5.004838 -0.625020  2.526941
C  -0.232649  2.965228  2.642066
H   0.574129  2.240429  2.800821
H  -0.216682  3.228356  1.578106
H   0.003045  3.864519  3.220105
C  -4.328601  3.243847  5.567715
H  -4.126871  2.762949  6.534933
H  -4.048851  4.298311  5.666030
H  -5.410770  3.194437  5.403583

#=============================END

124
3–CNR’’ triplet
Cr  0.254422 -0.341203 -0.236016
O  -0.772331 -1.682125 -0.924697
O   1.562599 -0.837824  0.927198
N   0.605228  0.898767 -1.271525
C  -1.931760 -2.302671 -1.450828
C  -3.034861 -2.309833 -0.342802
C  -2.375111 -1.444076 -2.760260
C  -1.509247 -3.855434 -1.705608
C  -4.401096 -2.531603 -0.591208
C  -2.664534 -2.166969  1.003785
C  -3.311770 -2.138799 -3.780345
C  -3.076303 -0.146522 -2.290221
C  -1.145920 -0.994385 -3.592663
C  -0.909740 -4.436537 -0.404332
C  -2.683662 -4.789486 -2.081536
C  -0.417508 -3.990351 -2.788666
C  -5.341897 -2.584043  0.439405
H  -4.757783 -2.673027 -1.601888
C  -3.595887 -2.228830  2.043164
H  -1.620632 -2.027195  1.246643
H  -4.240543 -2.529855 -3.361520
H  -3.596540 -1.399043 -4.539436
H  -2.810748 -2.954340 -4.308088
H  -3.211440  0.527400 -3.144823
H  -4.062005 -0.331252 -1.856184
H  -2.468372  0.378710 -1.548797
H  -0.637611 -1.826364 -4.079887
H  -1.497294 -0.325329 -4.388976
H  -0.417270 -0.452377 -2.993333
H  -0.585057 -5.467384 -0.589789
H  -0.043283 -3.865047 -0.073325
H  -1.637989 -4.465842  0.410731
H  -3.167267 -4.533851 -3.025073
H  -2.291419 -5.808366 -2.189572
H  -3.448917 -4.820230 -1.301229
H   0.406317 -3.292769 -2.616399
H  -0.006773 -5.006962 -2.760317
H  -0.804941 -3.834061 -3.799287
C  -4.947350 -2.432976  1.768500
H  -6.387978 -2.752314  0.195053
H  -3.255181 -2.124655  3.070681
H  -5.677007 -2.482515  2.572562
C   2.799660 -1.165707  1.526457
C   3.961357 -1.044704  0.490199
C   3.020016 -0.071927  2.702146
C   2.628576 -2.730786  1.962885
C   5.295551 -1.373839  0.797212
C   3.707952 -0.628256 -0.823800
C   4.388319 -0.091719  3.426171
C   2.907605  1.332962  2.067468
C   1.927074 -0.175109  3.785702
C   2.779387 -3.605750  0.693804
C   3.627850 -3.264295  3.013756
C   1.217933 -3.024192  2.530974
C   6.314055 -1.285879 -0.152895
H   5.563921 -1.713587  1.787060
C   4.723001 -0.537428 -1.779547
H   2.701652 -0.365536 -1.115743
H   5.204021  0.227220  2.773361
H   4.346143  0.624797  4.256497
H   4.647779 -1.060988  3.854809
H   3.111761  2.096718  2.828520
H   3.631783  1.466727  1.257753
H   1.911787  1.513051  1.661538
H   2.077875 -1.030286  4.451181
H   1.956791  0.723989  4.414784
H   0.930674 -0.249834  3.343086
H   2.473850 -4.634739  0.918222
H   2.146935 -3.238827 -0.119327
H   3.809759 -3.636760  0.330204
H   3.500613 -2.791342  3.991629
H   3.440204 -4.336471  3.152835
H   4.673205 -3.168161  2.713301
H   0.434051 -2.715455  1.841129
H   1.120818 -4.105942  2.683085
H   1.033758 -2.548481  3.495533
C   6.036835 -0.863931 -1.452545
H   7.328892 -1.554249  0.130926
H   4.473841 -0.213338 -2.787419
H   6.828598 -0.796582 -2.194156
C   0.749404  2.232444 -1.799957
C   1.733846  2.197541 -3.002792
C   1.310278  3.214415 -0.737198
C  -0.618201  2.773828 -2.297342
C   1.895690  3.609124 -3.605023
H   1.353269  1.496975 -3.756412
H   2.702457  1.812848 -2.660264
C   1.473636  4.625696 -1.340098
H   0.624479  3.242362  0.120305
H   2.273007  2.839973 -0.372482
C  -0.453022  4.185147 -2.899426
H  -1.322034  2.797188 -1.454740
H  -1.030012  2.084516 -3.042625
C   0.525425  4.123717 -4.090498
C   2.452649  4.565306 -2.530583
H   2.592629  3.558983 -4.452165
C   0.104163  5.141774 -1.825645
H   1.871064  5.300382 -0.569849
H  -1.432306  4.544298 -3.243499
H   0.634055  5.120011 -4.540961
H   0.128319  3.461092 -4.871725
H   3.438901  4.220206 -2.191568
H   2.592936  5.569477 -2.954213
H   0.206567  6.154925 -2.238234
H  -0.595169  5.209779 -0.980466
C  -0.999233  0.626853  1.064042
N  -1.671438  1.381244  1.658452
C  -2.473692  2.276052  2.354471
C  -3.844875  2.348433  2.029335
C  -1.876679  3.078937  3.349308
C  -4.622392  3.261506  2.746183
C  -4.444379  1.481738  0.954281
C  -2.703395  3.973334  4.032545
C  -0.407127  2.975005  3.660039
C  -4.062834  4.065264  3.737917
H  -5.681575  3.338865  2.517194
H  -3.956129  1.646803 -0.012688
H  -4.338224  0.416415  1.186497
H  -5.509348  1.700049  0.836900
H  -2.269676  4.603975  4.803579
H  -0.134806  1.965867  3.987775
H   0.209779  3.196321  2.781096
H  -0.130644  3.675791  4.452490
H  -4.688012  4.767785  4.281806

#=============================END

124
Transition State for 3–CNR’’
Cr  0.411144 -0.005163  0.153722
O   1.023400  1.616828  0.582895
O   1.713768 -1.102705 -0.364234
N  -1.031454 -0.616886  0.865452
C   1.050642  3.023588  0.770851
C   0.508516  3.721167 -0.514032
C   0.099769  3.319934  2.058803
C   2.627782  3.381783  0.904812
C   0.203251  5.093364 -0.567736
C   0.342778  2.998298 -1.703392
C   0.336357  4.655863  2.801723
C  -1.379444  3.292604  1.604130
C   0.238471  2.212401  3.134716
C   3.378746  2.762543 -0.298598
C   2.957769  4.893321  0.881781
C   3.260686  2.775625  2.176066
C  -0.261130  5.700316 -1.735019
H   0.326448  5.715273  0.308109
C  -0.117148  3.598031 -2.878671
H   0.583104  1.944805 -1.720238
H   0.220369  5.542326  2.175275
H  -0.410644  4.739618  3.601051
H   1.318319  4.701354  3.278962
H  -2.033348  3.298379  2.485159
H  -1.647256  4.153915  0.987421
H  -1.596350  2.386705  1.032521
H   1.236302  2.157907  3.570740
H  -0.459950  2.433072  3.951578
H  -0.014102  1.229421  2.738355
H   4.435104  3.052507 -0.249395
H   3.331898  1.672753 -0.283913
H   2.984752  3.115648 -1.255950
H   2.472372  5.464723  1.674946
H   4.039676  5.008373  1.020567
H   2.705738  5.353469 -0.076983
H   3.013870  1.716165  2.279753
H   4.352132  2.857549  2.104591
H   2.961252  3.296036  3.090438
C  -0.428331  4.955778 -2.902443
H  -0.490398  6.763041 -1.726240
H  -0.225734  2.994232 -3.776196
H  -0.788294  5.427037 -3.813138
C   2.558888 -2.121855 -0.869635
C   3.926539 -1.960048 -0.133671
C   1.904995 -3.535378 -0.428548
C   2.725645 -1.806644 -2.457564
C   5.072233 -2.703679 -0.467484
C   4.055025 -1.039951  0.916821
C   2.788304 -4.785283 -0.660714
C   1.640109 -3.491656  1.096005
C   0.551757 -3.788585 -1.123935
C   3.698145 -0.614947 -2.635228
C   3.250466 -2.970424 -3.330093
C   1.391459 -1.357241 -3.100639
C   6.279201 -2.535957  0.213050
H   5.042371 -3.429030 -1.268998
C   5.259092 -0.869245  1.603228
H   3.198584 -0.441829  1.196430
H   3.683248 -4.778415 -0.034195
H   2.205571 -5.670468 -0.377254
H   3.094985 -4.925041 -1.698377
H   1.215911 -4.451247  1.416100
H   2.561206 -3.330295  1.663809
H   0.933553 -2.704173  1.360744
H   0.664548 -4.034978 -2.183771
H   0.057754 -4.645385 -0.648453
H  -0.116628 -2.929905 -1.033542
H   3.674024 -0.278725 -3.679061
H   3.408388  0.230760 -2.005727
H   4.731392 -0.876082 -2.393926
H   2.543275 -3.802157 -3.390288
H   3.391615 -2.597329 -4.352056
H   4.216802 -3.362024 -3.006119
H   1.012881 -0.440192 -2.647890
H   1.569635 -1.149954 -4.162660
H   0.605300 -2.111205 -3.044877
C   6.382335 -1.616798  1.256665
H   7.141368 -3.129843 -0.080411
H   5.312134 -0.142236  2.409822
H   7.321848 -1.485479  1.786987
C  -2.049226 -1.212924  1.698041
C  -1.453315 -1.597952  3.081277
C  -2.614153 -2.496021  1.029633
C  -3.222383 -0.221749  1.930627
C  -2.533591 -2.245206  3.974074
H  -1.049489 -0.698064  3.560740
H  -0.616834 -2.290834  2.932203
C  -3.692826 -3.139513  1.926316
H  -3.043542 -2.236428  0.054547
H  -1.793183 -3.200180  0.850728
C  -4.300628 -0.868369  2.827087
H  -3.656359  0.059876  0.963503
H  -2.834401  0.692055  2.395231
C  -3.685985 -1.244111  4.190401
C  -3.074808 -3.515924  3.287812
H  -2.085675 -2.509122  4.941268
C  -4.845501 -2.137926  2.141411
H  -4.074902 -4.041923  1.430769
H  -5.116759 -0.148629  2.974367
H  -4.453623 -1.684733  4.841272
H  -3.313876 -0.344177  4.699268
H  -2.264024 -4.243806  3.147242
H  -3.829947 -3.996804  3.924700
H  -5.630555 -2.593178  2.760557
H  -5.305849 -1.879305  1.178105
C  -1.176781 -0.025672 -0.933156
N  -2.096734  0.013004 -1.697837
C  -3.383797 -0.109388 -2.196460
C  -3.739599 -1.286039 -2.892056
C  -4.279703  0.973323 -2.051790
C  -5.037853 -1.376119 -3.400571
C  -2.740497 -2.395725 -3.099661
C  -5.564751  0.829060 -2.581502
C  -3.854620  2.246945 -1.366285
C  -5.950656 -0.334376 -3.244997
H  -5.328472 -2.278173 -3.933170
H  -1.847048 -2.032534 -3.622094
H  -2.398098 -2.824754 -2.150998
H  -3.177339 -3.202710 -3.695180
H  -6.267766  1.651235 -2.473765
H  -3.624896  2.084242 -0.306851
H  -2.950644  2.667496 -1.822493
H  -4.647884  2.998040 -1.424505
H  -6.954746 -0.424031 -3.649770

#=============================END

119
2–carbodiimide triplet
Cr -0.055594 -0.169254 -0.108552
O   1.170267 -1.309787  0.488534
O   0.211638  1.507280 -0.625733
N  -1.717485 -0.919908 -0.507711
C   2.156811 -2.333044  0.250253
C   3.470181 -1.866521  0.944257
C   1.578624 -3.637072  1.033957
C   2.382916 -2.436173 -1.344544
C   4.639726 -2.649122  0.967857
C   3.514273 -0.649392  1.635510
C   2.206766 -4.989736  0.628463
C   1.812938 -3.462046  2.556079
C   0.049593 -3.785423  0.860073
C   2.686819 -1.019450 -1.885165
C   3.578187 -3.303448 -1.816056
C   1.133139 -2.967080 -2.077677
C   5.792377 -2.224288  1.629715
H   4.670275 -3.610924  0.476693
C   4.664964 -0.218216  2.298873
H   2.629587 -0.032796  1.666720
H   3.292114 -5.018722  0.747493
H   1.799280 -5.765113  1.288375
H   1.959690 -5.282976 -0.395564
H   1.246765 -4.229995  3.096511
H   2.864717 -3.567719  2.833656
H   1.467525 -2.485064  2.903837
H  -0.268936 -3.891401 -0.177164
H  -0.275184 -4.687487  1.392822
H  -0.477490 -2.937307  1.296262
H   2.929335 -1.078629 -2.952394
H   1.841541 -0.334350 -1.789562
H   3.538903 -0.563086 -1.372591
H   3.563665 -4.325208 -1.435031
H   3.534213 -3.369875 -2.909816
H   4.539399 -2.850937 -1.563916
H   0.216174 -2.462638 -1.765838
H   1.249863 -2.803109 -3.155755
H   0.988740 -4.041083 -1.931582
C   5.816522 -1.000898  2.298298
H   6.673346 -2.861200  1.621564
H   4.651637  0.735033  2.821311
H   6.714053 -0.669348  2.813409
C   0.473544  2.913989 -0.555992
C   1.211187  3.272660 -1.885814
C  -0.962763  3.658710 -0.554086
C   1.437132  3.141411  0.728681
C   1.828055  4.515751 -2.114900
C   1.261938  2.345328 -2.936164
C  -0.892268  5.176292 -0.853692
C  -1.846068  3.046225 -1.665999
C  -1.737869  3.481609  0.767130
C   2.869261  2.676947  0.367039
C   1.543778  4.591941  1.259801
C   0.986365  2.296382  1.945393
C   2.472214  4.806088 -3.318068
H   1.811878  5.286045 -1.356646
C   1.900350  2.630490 -4.145203
H   0.789113  1.383214 -2.806220
H  -0.563123  5.380719 -1.875118
H  -1.902433  5.589712 -0.748844
H  -0.249359  5.730612 -0.167857
H  -2.769076  3.631197 -1.755202
H  -1.350907  3.061403 -2.641467
H  -2.129337  2.018255 -1.431310
H  -1.314977  4.057182  1.594831
H  -2.762478  3.844077  0.623557
H  -1.805189  2.435380  1.069692
H   3.480725  2.633132  1.275661
H   2.870990  1.680538 -0.082239
H   3.362743  3.357655 -0.330552
H   0.598011  4.967654  1.657044
H   2.262770  4.598982  2.088173
H   1.915234  5.306098  0.523167
H   0.970134  1.225322  1.729766
H   1.708972  2.437690  2.757596
H   0.005733  2.569726  2.331924
C   2.515666  3.863642 -4.344962
H   2.940353  5.778668 -3.447554
H   1.911763  1.879284 -4.931197
H   3.016877  4.089329 -5.282373
C  -1.855778 -0.380870  0.710049
N  -2.808352 -0.195432  1.524752
C  -2.820453  0.460423  2.766231
C  -3.878520  1.378956  2.973868
C  -1.923150  0.158930  3.817853
C  -3.974534  2.037911  4.201487
C  -4.893123  1.627388  1.884885
C  -2.063119  0.838703  5.033420
C  -0.865889 -0.907363  3.674698
C  -3.068390  1.782364  5.229404
H  -4.780301  2.752714  4.352739
H  -4.433726  2.057440  0.987607
H  -5.368783  0.691598  1.569076
H  -5.673366  2.313702  2.229956
H  -1.371845  0.609039  5.841396
H  -1.296575 -1.847229  3.309400
H  -0.076705 -0.630813  2.968876
H  -0.389604 -1.108351  4.639661
H  -3.157487  2.298503  6.181558
C  -2.572201 -1.612325 -1.403055
C  -3.512348 -2.566928 -0.939937
C  -2.441998 -1.361024 -2.790133
C  -4.330557 -3.197959 -1.882608
C  -3.285707 -2.026683 -3.681006
C  -4.249933 -2.941068 -3.252060
H  -5.051266 -3.929871 -1.523753
H  -3.185234 -1.817115 -4.743935
C  -1.425342 -0.389902 -3.335619
H  -1.547845  0.611748 -2.917906
H  -0.398826 -0.709202 -3.119223
H  -1.517036 -0.313566 -4.423251
C  -3.643620 -2.971413  0.508288
H  -2.676767 -3.257930  0.933908
H  -4.027051 -2.153697  1.124792
H  -4.316681 -3.829525  0.597233
C  -5.178481 -3.617745 -4.231687
H  -4.705409 -3.745234 -5.211352
H  -5.488950 -4.605171 -3.873565
H  -6.091582 -3.027149 -4.386746

#=============================END

124
3–carbodiimide triplet
Cr  0.285570 -0.138800  0.097199
O  -0.565760 -1.491730 -0.651287
O   1.723685 -0.378367  1.109597
N  -0.215270  1.618337 -0.235799
C  -1.250145 -2.367299 -1.546275
C  -2.700370 -2.533502 -1.000598
C  -1.250800 -1.633896 -2.993290
C  -0.489012 -3.789437 -1.405190
C  -3.707610 -3.210454 -1.711661
C  -3.046111 -2.025088  0.259003
C  -1.489083 -2.541368 -4.223180
C  -2.349053 -0.542092 -3.001425
C   0.086276 -0.903077 -3.266643
C  -0.450662 -4.170471  0.095595
C  -1.175197 -4.981600 -2.114342
C   0.964545 -3.722240 -1.918244
C  -4.991939 -3.368627 -1.189662
H  -3.506014 -3.628833 -2.688634
C  -4.328234 -2.186017  0.790369
H  -2.301477 -1.495316  0.837360
H  -2.412780 -3.119969 -4.172136
H  -1.569607 -1.901541 -5.110642
H  -0.660187 -3.231443 -4.402079
H  -2.211789  0.107502 -3.874776
H  -3.355829 -0.962861 -3.055488
H  -2.297450  0.082589 -2.105037
H   0.955433 -1.560363 -3.243355
H   0.041035 -0.450278 -4.264624
H   0.252640 -0.089153 -2.558090
H   0.107802 -5.106038  0.216310
H   0.036383 -3.406392  0.702355
H  -1.456018 -4.329311  0.495631
H  -1.281918 -4.852957 -3.192309
H  -0.551801 -5.870520 -1.958649
H  -2.157902 -5.201381 -1.691506
H   1.511046 -2.867560 -1.513787
H   1.497918 -4.629014 -1.609363
H   1.018868 -3.679637 -3.010578
C  -5.311441 -2.858823  0.068302
H  -5.741913 -3.895404 -1.774640
H  -4.550206 -1.771726  1.769486
H  -6.310686 -2.983786  0.477113
C   3.113825 -0.594518  1.364320
C   3.868160 -0.799754  0.021087
C   3.660782  0.774762  2.040353
C   3.137661 -1.945321  2.277913
C   5.179328 -1.305319 -0.039837
C   3.282961 -0.446627 -1.201294
C   5.192573  0.831007  2.250164
C   3.323158  1.957274  1.103595
C   2.981257  1.070591  3.392655
C   3.046180 -3.191205  1.365055
C   4.371581 -2.141222  3.192170
C   1.899662 -2.010783  3.210286
C   5.853190 -1.463567 -1.250661
H   5.695691 -1.588381  0.867292
C   3.948389 -0.597366 -2.420113
H   2.286297 -0.020132 -1.219431
H   5.739969  0.783073  1.305424
H   5.436747  1.794146  2.714532
H   5.576299  0.053302  2.910900
H   3.672791  2.889889  1.561944
H   3.816268  1.864369  0.131132
H   2.248694  2.045719  0.940446
H   3.287266  0.380129  4.182887
H   3.263631  2.077876  3.722416
H   1.894186  1.043001  3.307091
H   2.817494 -4.071611  1.977407
H   2.249616 -3.088170  0.626264
H   3.975873 -3.395034  0.828247
H   4.428826 -1.399548  3.992747
H   4.282919 -3.122952  3.672991
H   5.325224 -2.141747  2.659778
H   0.969149 -2.086562  2.645318
H   1.981972 -2.909324  3.833572
H   1.818755 -1.154785  3.880555
C   5.241386 -1.112707 -2.453983
H   6.863280 -1.865132 -1.247409
H   3.447945 -0.306329 -3.339930
H   5.764728 -1.235717 -3.398134
C  -0.184216  2.909693 -0.953831
C   0.944090  2.905676 -2.003923
C   0.058575  4.062659  0.052794
C  -1.539217  3.145042 -1.666504
C   0.972102  4.256405 -2.751472
H   0.781649  2.086881 -2.716256
H   1.907307  2.724399 -1.510967
C   0.087309  5.412606 -0.696294
H  -0.734639  4.056204  0.808308
H   1.009855  3.898970  0.573039
C  -1.511397  4.497314 -2.410488
H  -2.345634  3.127135 -0.925523
H  -1.724267  2.327987 -2.373736
C  -0.379940  4.482358 -3.459008
C   1.220507  5.396771 -1.743385
H   1.780537  4.235987 -3.493854
C  -1.264851  5.637620 -1.402504
H   0.264737  6.216750  0.029707
H  -2.477307  4.646948 -2.910396
H  -0.361874  5.432328 -4.010478
H  -0.558567  3.687968 -4.196937
H   2.191473  5.258812 -1.248187
H   1.263561  6.360558 -2.268926
H  -1.263839  6.606186 -1.921044
H  -2.076168  5.669669 -0.663083
C  -1.009594  1.238114  0.765822
N  -1.970785  1.756913  1.406344
C  -2.779260  1.248214  2.432797
C  -4.174277  1.208318  2.197197
C  -2.262519  0.914137  3.705302
C  -5.023305  0.791386  3.225967
C  -4.729397  1.610121  0.853942
C  -3.148772  0.502214  4.706155
C  -0.787431  1.024777  3.994333
C  -4.520869  0.431675  4.476155
H  -6.094771  0.757638  3.040826
H  -4.401868  2.619166  0.576732
H  -4.388188  0.935020  0.060177
H  -5.824066  1.592545  0.862857
H  -2.749038  0.242432  5.684009
H  -0.205142  0.274945  3.448313
H  -0.397666  2.006573  3.698980
H  -0.588679  0.885598  5.061876
H  -5.194057  0.113728  5.267772
